# Supplementary material for: Understanding the relationship between streamflow forecast skill and value across the western US
Source: Copernicus journal article supplement (doi:10.5194/egusphere-2024-4046), 2025-01-14
Supplement: Supplementary file [file egusphere-2024-4046-AC1-supplement.pdf]

## Author's replies

### Understanding the relationship between streamflow forecast skill and value across the western US

[Manuscript ID #2024-4046]

Our responses to the reviewer's comments appear in *blue italics*, and the proposed revisions (at this stage) in *red italics*.

#### Referee 1

The manuscript by Modi et al. presents a study on the link between forecast skill and value, in the case of a sample of unmanaged, snow-dominated stations in the United States. The authors focus on the prediction of low AMJJ volumes issued based on the ESP method with a distributed and an LSTM models, or taken directly from the NRCS operational forecasts. Synthetic forecasts based on streamflow climatology and introducing deviations in mean and in standard deviation serve as a reference to assess errors in true forecasts and derive skill and value for controlled forecast errors. Results reveal a symmetry in forecast skill, but an asymmetry in forecast value, and discuss the inadequacy of the initially chosen skill metric to explain value.

The paper is of very high quality, well written and very well illustrated. It tackles a lot of different scientific objectives, which include comparing the chosen LSTM and distributed models, and studying the relationship between skill in value in controlled and real forecast systems. I was unsure to which extent the first objective serves the second, or not, because the paper becomes lengthy with information that is secondary to the skill-value relationship. Nevertheless, I recommend this paper for publication provided that the points below are addressed or commented on.

*Response: Thank you for your careful review of our manuscript and the constructive comments that helped us improve our work.*

#### General comments

1) Both WRFH and the LSTM generate daily streamflow volumes summed up to generate AMJJ volumes. In the case of the LSTM, it is not clear why the model was not trained on AMJJ volumes directly.

*Response: Thank you for this question. This study builds upon our earlier work, extending the LSTM-ESP framework and further evaluating its applicability. We used ESP for both models to maintain a consistent methodological approach in our study. While NRCS statistical forecasts are trained directly on AMJJ volumes, our approach focuses on generating daily streamflow volumes and summing them to seasonal totals, which is consistent with the WRFH approach. Training the LSTM directly on AMJJ volumes remains a promising avenue for research currently, as it could be computationally more efficient. We will add a sentence in section 2.4 for further clarification on LSTM approach. More details on our previously published work on this topic can be accessed at: <https://doi.org/10.1029/2024MS004582>.*

*Original: "Both forecast systems generate daily streamflow volumes from April to July, which are summed up to generate AMJJ volumes. However, it is important to note that WRFH is run on an hourly timescale, and its outputs are aggregated to daily values."*

*Proposed: “It is important to note that WRFH is run on an hourly timescale, and its outputs are aggregated into AMJJ volumes. Similarly, the LSTM follows the WRFH approach but runs on a daily timescale, with its outputs aggregated into AMJJ volumes.”*

2) Section 2.1.3: The same cost is used for hits and false alarms. One could argue that a false alarm does more damage than just the preventive cost since it may deteriorate trust in or reputation of the decision-making institutions. This is not something accounting for here, but that would be worth discussing.

*Response: Thank you for raising this important point regarding the asymmetric impact of false alarms versus hits. In the current PEV methodology, we use the same cost for hits and false alarms to maintain a simplified and standardized assessment approach. However, we acknowledge that in real-life decision-making, false alarms can have broader consequences beyond the immediate preventive costs (C), such as spoiling trust in forecasting systems and decision-making authorities. While this aspect is not explicitly accounted for in our analysis, it is a valuable consideration for future work. Exploring ways to incorporate reputation-related costs or adjusting the cost-loss ratio to reflect symmetric impact could enhance the framework’s applicability. We will add the following paragraph to the Discussion section to address this limitation.*

*Proposed: “While the PEV framework assumes equal costs for hits and false alarms, we recognize that real-life decision-making may be more sensitive to false alarms due to their potential to damage trust in forecasting systems and decision-making authorities. Future work could explore ways to incorporate asymmetric cost structures or impacts of reputation to better reflect these considerations in operational settings.”*

3) Throughout the results section, and related to Figure 8 and L237, it was not clear to me which tau value was chosen, or if a range of tau’s were used in the assessment of the APEV<sub>max</sub>. I think this point requires clarification in Section 2.1.3, and potentially reminders in the interpretation of results.

*Response: Thank you for your feedback. To clarify, the PEV framework is applied across a range of critical probability thresholds ( $0 < \tau < 1$ ), generating a set of possible PEV values for each cost-to-loss ratio ( $0 < \alpha < 1$ ), as mentioned in L202-203. This approach allows us to identify PEV<sub>max</sub> from the range of curves and compute the area under the curve (APEV<sub>max</sub>). We will revise Section 2.1.3 to explicitly state this process and include reminders in the Results section to ensure clarity in the interpretation of Figure 8 and related discussions.*

*Original: “To represent the forecast value in this study, we calculated the area under the PEV<sub>max</sub> curve (now “APEV<sub>max</sub>”) using the trapezoidal rule (Amlung et al., 2015). This method approximates the area by dividing the curve into trapezoids and integrating their areas. The resulting metric can be used as “forecast value of a given forecast system” when the maximum economic benefits across all  $\alpha$  are obtained at their respective  $\tau$  (shown by the red shading in Fig. 2).”*

*Proposed: “To represent the forecast value in this study, we calculated the area under the PEV<sub>max</sub> curve (now “APEV<sub>max</sub>”) using the trapezoidal rule (Amlung et al., 2015). This method approximates the area by dividing the curve into trapezoids and integrating their areas. Note that the PEV framework is applied iteratively across a range of critical probability thresholds ( $0 < \tau < 1$ ) to identify PEV<sub>max</sub> and to compute APEV<sub>max</sub> by integrating over the corresponding curve. The resulting metric can be used as the “forecast value of a given forecast system” when the maximum economic benefits across all  $\alpha$  (shown by the red shading in Fig. 2).”*

4) Section 2.1.1 could benefit from a few clarifications. In particular the phrases “percentile of dryness” or “driest 2% conditions” were a bit unclear. The variables are listed, but the time step or period to be considered are unclear, and would be interesting to have for reference. It would also be interesting to add a sentence to state why this choice of methodology here, and why deviate from the methodology proposed by the USDM. The length of the historical period would also be interesting to have at this stage.

*Response: Thank you for your comment. The phrase “percentile of dryness” refers to the percentile ranking of hydrologic variables (such as precipitation, streamflow, etc.) within their historical distribution, indicating how dry the current conditions are relative to past events. The analysis is calculated over a standard scale of 1-3 months based on the historical period of record. To avoid confusion here, we will clearly mention in Section 2.3 the historical period used for this analysis since that is associated with the availability of operational forecasts. Furthermore, we will clarify why we focused on AMJJ streamflow volumes and deviated from the USDM’s multi-variable approach, as this choice was made to directly capture hydrologic drought conditions and maintain consistency with the objectives of this study.*

*Original: “The U.S. Drought Monitor (USDM) classifies drought into five categories based on threshold percentiles in key hydroclimate quantities, (e.g., precipitation, soil moisture, streamflow) – D0 (Abnormally dry), D1 (Moderate drought), D2 (Severe drought), D3 (Extreme drought), and D4 (Exceptional drought), with D0 being the least intense and D4 the most intense (Svoboda et al., 2002). Each category corresponds to specific percentile ranges of historical drought severity, with D0 indicating conditions in the 21<sup>st</sup> to 30<sup>th</sup> percentile of dryness, D1 in the 11<sup>th</sup> to 20<sup>th</sup> percentile, D2 in the 6<sup>th</sup> to 10<sup>th</sup> percentile, D3 in the 3<sup>rd</sup> to 5<sup>th</sup> percentile, and D4 representing the driest 2% of conditions. This study uses a categorical definition of hydrologic drought, occurring when the AMJJ streamflow volume that falls below the 25<sup>th</sup> percentile ( $P_{25}$ ) of the historical record. To assess the skill-value relationship across different drought severities, we also consider two additional hydrological thresholds where the AMJJ volume falls below the 35<sup>th</sup> percentile and a severe drought where it falls below the 15<sup>th</sup> percentile.”*

*Proposed: “The U.S. Drought Monitor (USDM) classifies drought into five categories based on threshold percentiles in key hydroclimate quantities, e.g., precipitation, soil moisture, streamflow, over a standard 1-3 month period, based on a historical period of record – D0 (Abnormally dry), D1 (Moderate drought), D2 (Severe drought), D3 (Extreme drought), and D4 (Exceptional drought), with D0 being the least intense and D4 the most intense (Svoboda et al., 2002). Each category corresponds to specific percentile ranges of historical drought severity, with D0 indicating conditions in the 21<sup>st</sup> to 30<sup>th</sup> percentile of dryness, D1 in the 11<sup>th</sup> to 20<sup>th</sup> percentile, D2 in the 6<sup>th</sup> to 10<sup>th</sup> percentile, D3 in the 3<sup>rd</sup> to 5<sup>th</sup> percentile, and D4 representing the driest 2% of conditions based on the historical distribution of hydrologic variables. For clarity, the term “percentile of dryness” refers to the relative position of the observed value within this historical distribution. We use a categorical definition of hydrologic drought, occurring when AMJJ streamflow volume falls below the 25<sup>th</sup> percentile ( $P_{25}$ ) of the historical record. To assess the skill-value relationship across different drought severities, we also consider two additional hydrological thresholds: one where AMJJ volume falls below the 35<sup>th</sup> percentile and another where it falls below the 15<sup>th</sup> percentile, indicating severe drought conditions. This approach deviates from the USDM methodology, which typically uses a range of hydroclimatic variables for its classification. We chose to focus specifically on AMJJ streamflow volumes to capture hydrologic drought conditions more directly and to maintain consistency with the study’s objectives.”*

5) Section 2.1.2: A sum may be missing (in the equation or in the text) to compute losses for several forecasts. Related to this, the term  $n$  is not defined. Regarding notations,  $z$  is rather a probability of exceedance/non-exceedance associated with quantile  $y_z$ . Related to the final discussion on the inadequacy of this skill metric to reflect value, the equal weighting of the 3 quantiles is probably not suitable, nor resembling actual decision-making contexts (reflecting unequal importance on high/low volumes or asymmetrical decision thresholds). Could the author discuss this? Could another weighting or picking of quantile values be enough to match value patterns?

*Response: Thank you for pointing that out. There is a sum missing in equation 1, and  $n$  corresponds to the number of observations ( $n \sim 5$  per basin since we are considering only drought years). We will revise the equation in the next version.*

*Further, we thank the reviewer for bringing up the issue of the equal weighting of the three quantiles in the context of decision-making. While the use of quantile loss as a skill metric is employed for assessing the accuracy of probabilistic forecasts, we acknowledge that this approach does not fully capture the unequal importance of quantiles, especially when the decision-making context involves asymmetrical thresholds or varying cost-loss functions associated with different forecast outcomes. We acknowledge that certain quantiles may indeed be more critical than others, particularly in scenarios where higher or lower values carry disproportionately more weight in terms of socioeconomic impact. This is especially true during drought events. We agree that exploring alternative weighting schemes for quantile loss or selectively focusing on specific quantiles could better match the decision-making contexts. Future work could investigate different functions for weighted quantile loss, assigning higher weights to quantiles that reflect their context in decision-making.*

*Proposed (in the Discussion): “To better reflect decision-making contexts, it may be beneficial to explore weighted quantile loss metrics, where different quantiles receive different weights depending on their relative importance in decision-making. Such a weighting scheme would better align with situations where high or low values have disproportionate consequences, as is often the case in hydrologic forecasting.”*

6) Section 2.3: This section may benefit from some discussion points about the choice of a normally distributed ensemble, which later appears to be a limit, about the fact that forecasts often overestimate in dry conditions and underestimate in wet conditions which is not mimicked here, about the fact that deviations applied reflect errors in mean (bias) or characteristics in terms of spread (sharpness), but the likely important feature here is rather discrimination, which is not experimented on. Related to Figure 4, a comment on the year-to-year variation in the forecast would be helpful. Are they solely due to the exclusion of the forecast year?

*Response: We thank the reviewer for their insightful comment. Using a normally distributed ensemble is indeed a simplifying assumption, and we recognize that this choice does not fully capture the complexities of real-world forecasts. In practice, forecasts often exhibit systematic biases, such as overestimating in dry conditions and underestimating in wet conditions (Modi et al., 2021). This is a potential limitation of the current approach, as it does not explicitly incorporate such biases. Moreover, while we applied errors to the mean (bias) and standard deviation (sharpness) to simulate forecast errors, we agree that the ability of the forecast to discriminate between different scenarios—i.e., its ability to identify and differentiate between drought and non-drought conditions—is a crucial feature that was not explicitly explored in this study. Discrimination, or the forecast’s ability to correctly classify extreme events, is indeed an important aspect of forecast skill that warrants further attention but was outside the scope of this manuscript, given the already lengthy treatment of each topic. That said, we believe this to be a*

*viable area of future inquiry to investigate discrimination-based metrics to complement the mean and spread-based error metrics. We have added a brief paragraph in the Discussion section*

*Regarding Figure 4, the minor year-to-year variations in the forecast are solely due to the exclusion of the forecast year. This method ensures that the forecast is independent of the year being evaluated, but it introduces minor variations between years.*

*Proposed: “The use of a normally distributed ensemble is a simplification that allows us to model forecast uncertainty in a controlled manner. While real-world forecasts often exhibit more complex, irregular distributions and biases. For example, these may be overestimated in dry conditions and underestimated in wet conditions – Modi et al., 2021. A normal distribution was chosen to solely isolate the impact of mean and standard deviation. We recognize that this assumption does not fully capture the nuances of real-world forecast errors, such as skewness or non-normality in extreme conditions, which would require detailed treatment outside the scope of this analysis.”*

*Reference: Modi, P. A., Small, E. E., Kasprzyk, J., & Livneh, B. (2022). Investigating the role of snow water equivalent on streamflow predictability during drought. Journal of Hydrometeorology, 23(10), 1607–1625. <https://doi.org/10.1175/JHM-D-21-0229.1>*

7) Section 2.5: Please clarify the RMAD criterion, in particular how errors between true and synthetic forecasts are calculated given that they are ensemble forecasts.

*Response: Thank you for your comment. The Relative Median Absolute Deviation (RMAD) criterion compares the variability between synthetic and true forecasts by measuring the median of the relative absolute errors. Given that both the true and synthetic forecasts are ensemble forecasts, the errors between the two are calculated by first comparing the corresponding ensemble members. Specifically, for each forecast, the absolute difference between the corresponding ensemble members of the true and synthetic forecasts is computed, and these errors are then normalized by the true forecast values. The median of these normalized errors is then taken to quantify the RMAD, with lower values indicating better alignment between the two ensembles.*

*Original: “We use the Relative Median Absolute Deviation (RMAD) to compare the variability between synthetic and true forecasts. RMAD measures the median of the relative absolute errors between the true and synthetic forecasts, with values closer to 0 indicating smaller deviations and better alignment between the forecasts.”*

*Proposed: “We use the Relative Median Absolute Deviation (RMAD) to compare the variability between synthetic and true forecasts. RMAD measures the median of the relative absolute errors between the true and synthetic forecasts. Since both the true and synthetic forecasts are ensemble forecasts, the errors are calculated by first determining the absolute difference between corresponding ensemble members. These absolute errors are then normalized by the true forecast values to compute relative errors. The median of these relative errors across the ensemble members is then used to quantify RMAD, with values closer to 0 indicating smaller deviations and better alignment between the true and synthetic forecasts.”*

8) Throughout the manuscript and more specifically L521 “higher forecast skill and value were associated with negative errors in standard deviation”: “negative errors in standard deviation” can be misleading. Changes in sharpness, in themselves, are not errors if they are not associated with an absence of bias (seen in the skill matrices). Sharpness is not a performance metric. Here negative errors in standard deviation rather mean that the ensemble is close to a deterministic forecast, which is only associated with high forecast skill if, and only if, the forecasts are not biased. I recommend changing the phrase error in



standard deviation throughout the paper, and recommend the following paper: Gneiting, T., Balabdaoui, F., Raftery, A.E., 2007. Probabilistic forecasts, calibration and sharpness. Journal of the Royal Statistical Society: Series B (Statistical Methodology) 69, 243–268.

*Response: Thank you for the insightful comment. We will revise the phrase “error in standard deviation” to “change in variability” throughout the manuscript. We agree that the reduced variability is linked to high forecast skill only if the ensemble is unbiased, and we will reword the relevant sentences to better reflect that distinction. Additionally, we will incorporate a reference you suggested in the paper to further support our discussion.*

9) Figure 12: I don’t understand why the three models appear in Figure 12a if this figure shows the synthetic forecasts. If my understanding is correct, only observations are used to generate the synthetic forecasts. Could you please clarify? Also L611 “the true LSTM and the corresponding synthetic forecast” has me confused.

*Response: Thank you for your comment. To clarify, the background heatmaps in Figures 10 and 11 represent the median skill and value from synthetic forecasts, while the scatter points represent the true forecast systems. Each dot in those figures represents a basin. We use this overlap between synthetic and true forecasts from Figures 10 and 11 and plot the corresponding synthetic forecasts in Figure 12a. We describe this in L567 in section 3.3.1. We will revise the figure legend and caption to better explain this distinction.*

*Original: “Figure 12: Scatter plots depicting the relationship between skill (NMQloss) and value (APEVmax) for synthetic and true forecast systems. The points in (a) and (b) represent the synthetic forecast (the grid of the heatmap) that overlap with true forecast systems (scatter point) in Figures 4.10 and 4.11. Each point represents a basin, with the fitted exponential curves (dashed lines) indicating general trends and values in round brackets correlation.”*

*Proposed: “Figure 12: Scatter plots depicting the relationship between skill (NMQloss) and value (APEVmax) for synthetic and true forecast systems. The points in (a) and (b) represent the synthetic forecast (the grid of the heatmap) that overlap with true forecast systems (scatter point) in Figures 4.10 and 4.11. Each point represents a basin, with the fitted exponential curves (dashed lines) indicating general trends and values in round brackets correlation. It should be noted that we use the overlap from Figures 10 and 11 to plot synthetic forecasts (corresponding to true forecasts) in Fig. 12a.”*

10) The use of term “skill” in the paper is not always consistent: L630 “better captured in categorical measures than skill”: In the way the word “skill” is used in this study, it is not a metric (sometimes the case when it is the comparison of the performance of a forecast system with the performance of a benchmark) but rather a term used to qualify the performance of the forecast. Based on the use of the word “skill” in this study, categorical measures could very well be metrics used to define forecast skill. I suggest rephrasing. Also L654 “forecast skill generally reflects the accuracy of forecasts” can be unclear as accuracy can be perceived as one feature of forecast skill.

*Response: Thank you for pointing that out. In this study, we define forecast skill as the model’s ability to accurately predict observed values rather than as an improvement over a reference forecasting system. We recognize that this definition of “skill” differs from the standard approach of comparing to a reference forecast. To better align with standard definitions, we will revise the manuscript to use “forecast quality” instead of “forecast skill” throughout.*

11) Key references are well used to corroborate or discuss results or limits of this work. Some references about asymmetry in decision-making, about synthetic forecasts, or about the need for adequacy between skill and value metrics can be found in the following works. I let the authors consider their relevance for their work:

Peñuela, A., Hutton, C., Pianosi, F., 2020. Assessing the value of seasonal hydrological forecasts for improving water resource management: insights from a pilot application in the UK. *Hydrology and Earth System Sciences* 24, 6059–6073. <https://doi.org/10.5194/hess-24-6059-2020>

Rouge, C., Peñuela, A., Pianosi, F., 2023. Forecast Families: A New Method to Systematically Evaluate the Benefits of Improving the Skill of an Existing Forecast. *Journal of Water Resources Planning and Management* 149, 04023015. <https://doi.org/10.1061/JWRMD5.WRENG-5934>

Crochemore, L., Materia, S., Delpiazzi, E. et al. 2024. A framework for joint verification and evaluation of seasonal climate services across socio-economic sectors. *Bulletin of the American Meteorological Society*. <https://doi.org/10.1175/BAMS-D-23-0026.1>

*Response: Thank you for suggesting additional references. We will review and integrate the suggested works to further support and strengthen our discussion.*

#### **Detailed comments**

L58-59: Please review the definition of probabilistic seasonal streamflow forecasts, as it is not necessarily volumes, the concept of season can be unclear, and the cited methods are not always combined.

*Response: Thank you for pointing that out. We will revise the sentence to improve the definition of probabilistic seasonal streamflow forecasts.*

*Original: “Probabilistic seasonal streamflow forecasts predict the range of potential water flow volumes in rivers or streams over a season using a combination of process-based and data-driven models, historical data, and climate forecasts.”*

*Proposed: “Probabilistic seasonal streamflow forecasts estimate the likelihood of different streamflow signatures over a given period, using various approaches such as process-based models, data-driven models, historical data, or climate forecasts, or a combination of these approaches.”*

L65: A definition and references for ESP would be necessary. Consider the following work: Day, G., 1985. Extended Streamflow Forecasting Using NWSRFS. *J. Water Resour. Plann. Manage.* 111, 157–170.

*Response: Thank you for pointing that out. We will add a short definition of ESP and the reference.*

*Original: “Over time, forecasting frameworks like the Ensemble Streamflow Predictions (ESP) have significantly improved in predicting water volumes through advances in hydrological modeling, the use of more accurate meteorological inputs, and the adoption of more sophisticated forecasting methods (Clark et al., 2016; Li et al., 2017).”*

*Proposed: “Ensemble Streamflow Predictions (ESP) is a hydrological forecasting method that generates multiple streamflow simulations using historical meteorological data as inputs to a hydrologic model (Day, 1985). Over time, ESPs have significantly evolved through advances in hydrological modeling, the use of more accurate meteorological inputs, and the adoption of more sophisticated forecasting methods (Clark et al., 2016; Li et al., 2017).”*

L66 “more accurate”: I am unsure whether this is about accuracy since ESP relies on climatology. It is rather about using outputs from dynamical meteorological or climate model instead.

*Response: Response: Thank you for pointing that out. We modify the language to ‘evolved’, and we add a short definition of ESP and the reference.*

*Original: “Over time, forecasting frameworks like the Ensemble Streamflow Predictions (ESP) have significantly improved in predicting water volumes through advances in hydrological modeling, the use of more accurate meteorological inputs, and the adoption of more sophisticated forecasting methods (Clark et al., 2016; Li et al., 2017).”*

*Proposed: “Over time, ESPs have significantly evolved in predicting water volumes through advances in hydrological modeling, the incorporation of outputs from dynamical meteorological and climate models, and the adoption of more sophisticated forecasting methods (Clark et al., 2016; Li et al., 2017).”*

L115-116 “particularly during extreme events like droughts”: references would be needed to support this. Consider the following work: Giuliani, M., Crochemore, L., Pechlivanidis, I., Castelletti, A., 2020. From skill to value: isolating the influence of end user behavior on seasonal forecast assessment. Hydrology and Earth System Sciences 24, 5891–5902. <https://doi.org/10.5194/hess-24-5891-2020>

*Response: Thank you for providing this excellent suggestion. This paper explicitly discusses the skill-value relationship during drought years and reinforces the argument made. We will add the reference in the revised manuscript.*

*Original: “The relationship between forecast skill and value in seasonal streamflow forecasting is not only influenced by the operational characteristics of the water management system but also by the intrinsic qualities of the true forecasts themselves, particularly during extreme events like drought.”*

*Proposed: “The relationship between forecast skill and value in seasonal streamflow forecasting is not only influenced by the operational characteristics of the water management system but also by the intrinsic qualities of the true forecasts themselves, particularly during extreme events like drought. (Giuliani et al., 2020).”*

L124 “forecasts respond to fundamental statistical measures” Consider reformulating.

*Response: Thank you for pointing that out. We will reformulate the sentence in the revised manuscript.*

*Original: “We then evaluate how both synthetic and true forecasts respond to fundamental statistical measures such as errors in mean and standard deviation.”*

*Proposed: “We then assess how the performance of both synthetic and true forecasts are affected by fundamental statistical measures such as errors in mean and standard deviation.”*

L128 and elsewhere: the word “evaluate” may be ambiguous in a paper about forecast value if it is used for both skill and value. “assess” could be a more neutral option.

*Response: Thank you for the suggestion. We will revise this in the next version.*

L128: Section 2.1.2 is rather about defining drought

*Response: Thank you for pointing out the inconsistency. We will restructure the statement in the revised manuscript.*



*Original: “We begin by outlining the process for evaluating forecast skill using a quantile loss metric (Sect. 2.1.1) and defining drought, which serves as the basis for the categorical decision used to calculate the forecast value (Sect. 2.1.2). Section 2.1.3 describes the PEV framework for evaluating forecast value.”*

*Proposed: “We begin by defining drought, which serves as the basis for the categorical criterion used to calculate the forecast value (Sect. 2.1.1). Section 2.1.2 outlines the process for assessing forecast skill using a quantile loss metric, while Section 2.1.3 describes the PEV framework for assessing forecast value.”*

L135 “fundamental performance metrics” as above, the choice of the adjective “fundamental” is not clear to me. I would suggest reformulating or clarifying.

*Response: Thank you for pointing that out. In the revised version, the adjective “fundamental” (also referring to comment L124) will point to simple measures like error in mean and standard deviation. We will fix the statements elsewhere.*

*Original: “Section 2.5 provides an overview of fundamental performance metrics.”*

*Proposed: “Section 2.5 provides an overview of key performance metrics.”*

L196-197: “rate of occurrence” I suggest introducing s here.

*Response: Thank you for pointing that out. We will fix this in the revised version.*

*Original: “Where  $-\infty < PEV < 1$  and each expense term is the summation of the contingency table elements, each weighted by the rate of occurrence.”*

*Proposed: “Where  $-\infty < PEV < 1$  and each expense term is the summation of the contingency table elements, each weighted by the rate of occurrences.”*

L224-225: This sentence is key for understanding these 3 parameters. I would suggest placing it earlier in the section.

*Response: Thank you for pointing that out. We will reorder these suggested sentences earlier in the introductory paragraphs.*

L234-239: How are negative values accounted for when calculating the area? Is it possible to have negative  $PEV_{max}$  values?

*Response: Thank you for that question. It is possible to have negative  $PEV_{max}$  values, but they are excluded from the area calculation. We will add a sentence to indicate that in the revised version.*

*Original: “To represent the forecast value in this study, we calculated the area under the  $PEV_{max}$  curve (now “ $APEV_{max}$ ”) using the trapezoidal rule (Amlung et al., 2015). This method approximates the area by dividing the curve into trapezoids and integrating their areas.”*

*Proposed: “To represent the forecast value in this study, we calculated the area under the  $PEV_{max}$  curve (now “ $APEV_{max}$ ”) using the trapezoidal rule (Amlung et al., 2015). This method approximates the area by dividing the curve into trapezoids and integrating their areas. While negative  $PEV_{max}$  values are possible, they are excluded from the area calculation.”*

L239: While 0 is the theoretical minimum, 0.9 seems to be the observed maximum. If that is correct, I suggest clarifying this by stating the theoretical maximum (infinity?) before this observed maximum.

*Response: Thank you for the question. Since we exclude the negative  $PEV_{max}$  values for the area, the theoretical minimum and maximum are 0 and 0.9, respectively.*

*Original: “This value ranges from 0, showing the lowest overall economic value, to 0.9, being the highest overall economic value in this study.”*

*Proposed: “This value ranges from 0, representing the theoretical minimum economic value, to 0.9, representing the highest overall economic value in this study, as negative  $PEV_{max}$  values are excluded from the area calculation.”*

L247 “snow-dominated basins (i.e., unmanaged headwater systems)”: the correspondence between the two basin types is not direct. Some snow-dominated basins in areas with altitude gradients can be heavily managed/influenced by hydropower dams. Please clarify.

*Response: Thank you for pointing that out. We are only interested in the intersection between unmanaged and snow-dominated basins, which are often the headwater catchments that supply flows to downstream managed systems. We will fix this statement in the revised version.*

*Original: “Water availability in snow-dominated basins (i.e., unmanaged headwater systems) depends heavily on snowmelt timing and volume, making accurate forecasts essential for managing water resources and mitigating drought risks.”*

*Proposed: “Water availability in basins that are both unmanaged and snow-dominated are of interest here. These are often headwater catchments, with flows heavily driven by snowmelt timing and volume, making accurate forecasts essential for managing water resources and mitigating drought risks.”*

L269: Give the full name for SWE as this is the first occurrence.

*Response: Thank you for pointing that out. We will add the full name in the revised version.*

*Original: “These basins are colored by the ratio of April 1 SWE to water-year to-date cumulative precipitation that is derived from gridded snow and meteorological forcings (as described in Table A1).”*

*Proposed: “These basins are colored by the ratio of April 1 Snow Water Equivalent (SWE) to water-year-to-date cumulative precipitation that is derived from gridded snow and meteorological forcings (as described in Table A1).”*

L269: “water-year-to-date” may be worth explaining in its first occurrence as well.

*Response: Thank you for pointing that out. We will add an explanation in the revised version.*

*Original: “These basins are colored by the ratio of April 1 SWE to water-year to-date cumulative precipitation that is derived from gridded snow and meteorological forcings (as described in Table A1).”*

*Proposed: “These basins are colored by the ratio of April 1 Snow Water Equivalent (SWE) to water-year to-date cumulative precipitation, which refers to the accumulated precipitation from the beginning of the current water year, Oct 1, to April 1, derived from gridded snow and meteorological forcings (as described in Table A1).”*

L270: The reference to Table A1 is not clear to me.

*Response: Thank you for pointing that out. We have revised the statement to reference Table A2 instead of Table A1. We will also fix some inconsistencies concerning Table A2 (per later comments L315 and L377).*

*Original: “These basins are colored by the ratio of April 1 SWE to water-year-to-date cumulative precipitation that is derived from gridded snow and meteorological forcings (as described in Table A1).”*

*Proposed: “These basins are colored by the ratio of April 1 SWE to water-year-to-date cumulative precipitation that is derived from gridded snow and meteorological forcings (as described in Table A2).”*

L283 “WY2006-2022”: this notation used throughout the manuscript should be explained here.

*Response: Thank you for pointing that out. We will explain the notation in the revised version.*

*Original: “It should be noted that the standard deviation here is assumed to be equal to interannual variability seen in the observations based on the retrospective years available in the forecast system (for example, in Fig. 4, WY2006-2022).”*

*Proposed: “It should be noted that the standard deviation here is assumed to be equal to interannual variability seen in the observations based on the retrospective years available in the forecast system. We generate the forecasts for the years WY2006-2022, where “WY” represents the water year, Oct. 1 – Sep. 30 (Fig. 4).”*

L290: I suggest citing the number of ensemble members used in practice here

*Response: Thank you for pointing that out. We will add the number of ensemble members in the revised version.*

*Original: “An ensemble of forecast members is then generated, normally distributed around the modified mean and standard deviation.”*

*Proposed: “An ensemble of 39 forecast members is then generated, normally distributed around the modified mean and standard deviation.”*

L315 “snowpack information in the form of snow water equivalent”: Based on Figure 5, it seems only to be the case for the LSTM. Is this information also used in the case of WRFH?

*Response: Thank you for pointing that out. We will revise the statement on the next version.*

*Original: “In these systems, the primary input data consists of historical meteorology, geospatial basin attributes, snowpack information in the form of snow water equivalent (SWE), and streamflow observations—also used for training and validation (Table A1).”*

*Proposed: “In these systems, the primary input data consists of historical meteorology, geospatial basin attributes, snowpack information in the form of SWE (only for LSTM), and streamflow observations—also used for training and validation (Table A1).”*

L315: The reference to Table A1 does not seem correct.

*Response: Thank you for pointing that out. The reviewer is correct; instead, the reference should be to Table A2. We will revise the references.*

*Original: “In these systems, the primary input data consists of historical meteorology, geospatial basin attributes, snowpack information in the form of snow water equivalent (SWE), and streamflow observations—also used for training and validation (Table A1).”*

*Proposed: “In these systems, the primary input data consists of historical meteorology, geospatial basin attributes, snowpack information in the form of SWE (only for LSTM), and streamflow observations—also used for training and validation (Table A2).”*

L329: the probabilities extracted from the forecast ensembles can only be comparable if the ensembles have the same number of members. Here it seems to be the case (Section 2.4.1), but I suggest mentioning this here in Section 2.4 already for clarification.

*Response: Thank you for pointing that out. We acknowledge that the exceedance probabilities are comparable when the forecast ensembles have the same number of members. We will make a clarification in the statement.*

*Original: “All true forecasts include five forecasted exceedance probabilities at 90, 70, 50, 30, and 10%.”*

*Proposed: “All true forecasts have the same number of ensemble members, and five forecasted exceedance probabilities computed at 90, 70, 50, 30, and 10% are extracted.”*

L350 “~20-30 years”: In Figure 6, 23 years are mentioned, and L387 and 419, you mention the period 1983-2022 (40 years minus the forecast year). Please clarify.

*Response: Thank you for pointing that out. Figure 6 is simply for illustration purposes, showing an ESP forecast of 23 ensemble members. All the true forecasts and synthetic forecasts are based on members from WY1983-2022 (40 years minus the forecast year). This has been clarified as per comment L329. We will also revise the following statement to clarify the confusion.*

*Original: “The result is a daily probabilistic hydrologic forecast ranging from 30 days up to 180 days from the forecast date that uses the spread in historical data from the past ~20 to 30 years as an analogue for the uncertainty in meteorological conditions after the forecast date.”*

*Proposed: “The result is a daily probabilistic hydrologic forecast ranging from 30 days up to 180 days from the forecast date that uses the spread in historical data from the past ~20 to 30 years (shown in Fig. 6 based on 23 ensemble members only for illustration purposes) as an analogue for the uncertainty in meteorological conditions after the forecast date.”*

L377 Here as well, the reference to Table A1 does not seem to match its content.

*Response: Thank you for pointing that out. As per the earlier comment, we will revise the references.*

*Original: “Meteorological forcings used to run the WRF-Hydro (WRFH) include precipitation, average wind speed, 2 m average air temperature, incoming longwave and shortwave radiation, near-surface air pressure, and vapor pressure obtained from Analysis of Records for Calibration (AORC, Fall et al., (2023) – as detailed in Table A1).”*

*Proposed: “Meteorological forcings used to run the WRF-Hydro (WRFH) include precipitation, average wind speed, 2 m average air temperature, incoming longwave and shortwave radiation, near-surface air pressure, and vapor pressure obtained from Analysis of Records for Calibration (AORC, Fall et al., (2023) – as detailed in Table A2).”*

L389-390: I suggest the term “initial states” instead of “memory states”

*Response: Thank you for pointing that out. We will revise the statement in the next version.*

*Original: “For ESP forecasts on April 1, the WRFH simulation begins at the start of the water year, i.e., October 1, using true meteorological forcings to obtain WRFH’s memory states (e.g., snowpack, soil moisture) on the forecast date.”*

*Proposed: “For ESP forecasts on April 1, the WRFH simulation begins at the start of the water year, i.e., October 1, using true meteorological forcings to obtain WRFH’s initial states (e.g., snowpack, soil moisture) on the forecast date.”*

Sections 2.4.2 and 2.4.3: it would be helpful to state in these sections the years used for model training/calibration (now in Appendices), in addition to the years of historical meteorology inputs and for which the forecasts are generated (already clear).

*Response: Thank you for that suggestion. We agree that clearly stating the years used for model training/calibration could enhance clarity. However, to maintain a streamlined presentation in the main text, we believe it is best to keep all calibration details in one place, as currently presented in the appendices.*

Section 2.5: It is generally advised to use different metrics for calibration/training and verification/validation. It is not clear here which metrics are used for which purpose.

*Response: Thank you for pointing that out. The metrics used for calibration/training for each of the models are mentioned in the Appendices. Section 2.5 only mentions the metrics used to compare the historical performance (Section 3.1). We will revise the first sentence and add a statement towards the end of the paragraph clarifying this confusion in section 2.5.*

*Original: “We employed four fundamental performance metrics to calibrate/train the models and evaluate forecast accuracy, drawing from those widely adopted to quantify streamflow accuracy.”*

*Proposed: “We employed four key performance metrics to compare the historical performance of our designed true forecast systems, drawing from those widely adopted to quantify streamflow accuracy.”*

*Proposed (towards the end): “The metrics used to calibrate/train the true forecast systems are described in Appendices A1 and A2.”*

L473: If my understanding is correct, there is a single AMJJ value per year for the period 2006-2022 (17 values). How many years remain once only dry years are selected? Can it really ensure robust results for the rest of the study?

*Response: Thank you for raising this critical question. We recognize that estimating forecast skill and value for a smaller sample size (as you correctly mentioned,  $n \sim 5$ ) is not ideal, affecting the statistical power of the analysis. This limitation arises due to the limited availability of operational forecasts and the need for sufficient ensemble members for ESP. We extend our formal acknowledgement of this limitation in the Discussion section. We propose adding the following to the Discussion section.*

*Proposed: “We acknowledge that estimating forecast skill and value for dry years necessitates a smaller sample size (here  $n \sim 5$ ), which is not ideal, affecting the statistical power of the analysis. This limitation arises due to the limited availability of operational forecasts and the need for sufficient ensemble members for ESP. Therefore, it would be important to assess whether a broader selection criterion or longer span of forecast availability would help ensure robust results.”*



L481 “As errors in mean or standard deviation increase beyond these ranges, forecast skill worsens”: This is arguable. Here the standard deviation reflects the sharpness of the probabilistic forecast. However, sharpness is a forecast characteristic rather than a performance metric.

*Response: Thank you for pointing that out. As you correctly pointed out, we will rewrite the sentence for better clarification.*

*Original: “As errors in mean or standard deviation increase beyond these ranges, forecast skill worsens.”*

*Proposed: “As errors in mean increase beyond these ranges, forecast skill worsens. However, an increase in standard deviation reflects the variability of the probabilistic forecast, which is a characteristic of the forecast rather than a direct performance metric.”*

L483: In the text, values seem to reach 0.9, but in Figure 8, the color scale ends at 0.5.

*Response: Thank you for pointing that out. The  $APEV_{max}$  technically reaches 0.9, but the color scale is capped at 0.5 only for illustration purposes (i.e., to see the asymmetry better). We will update the caption to reflect that in the revised version.*

*Proposed: “Figure 8: Sensitivity of quantile loss (forecast skill) and  $APEV_{max}$  (forecast value) to errors in mean and standard deviation for synthetic forecasts. The background heatmaps (a and b) represent synthetic forecasts, with lower values showing better forecast skill (closer to yellow) and higher values better forecast value (closer to yellow). We also illustrate four synthetic forecasts (shown in blue) corresponding to different errors in mean and standard deviation (c-f). The black line and ribbon represent a synthetic forecast, with the mean equal to the observation and the standard deviation representing the interannual variability of the observations. The red dots indicate drought events, defined as AMJJ volumes below P25, whereas the histograms represent the hit (H), False Alarm (F), and Miss (M) rates. Note that the color scale for forecast value is capped at 0.5, although the actual values reach up to 0.9.”*

L496-498: This asymmetry is indeed interesting, and would benefit from some further discussion as to which parameters in the methodology cause this effect (AMJJ variable bounded by 0, tau value, alpha-s relationship and frequency of occurrence below 0.5 for droughts, ...).

*Response: Thank you for pointing that out. The observed asymmetry in forecast value is primarily due to the interplay between categorical measures, such as hit and false alarm rates, and mainly our focus on events below the  $P_{25}$  drought threshold. These factors cause forecast value to respond differently than forecast skill.*

*Original: “This highlights the different sensitivities of skill and value to errors in mean and standard deviation, likely due to the interplay of categorical measures, where forecast value responds differently than forecast skill.”*

*Proposed: “This asymmetry is largely due to the interplay of categorical measures, such as hit and false alarm rates, as well as our focus on events below the  $P_{25}$  drought threshold. These factors lead to different sensitivities of skill and value to errors in mean and change in variability.”*

L532 “Each dot in Fig. 10 represents a basin with colors showing the median skill and value”: is it just skill?

*Response: Thank you for pointing that out. We will revise the statement to reflect that the colors only show the skill and not the value.*

*Original: “Each dot in Fig. 10 represents a basin with colors showing the median skill and value only during drought years.”*

*Proposed: “Each dot in Fig. 10 represents a basin with colors showing the median skill only during drought years.”*

L580: Given that only a type of forecast skill is investigated here, I suggest the following “This skill-value comparison between synthetic and true forecast systems indicates that factors beyond forecast skill, as defined in this study...”

*Response: Thank you for the suggestion. We will revise the sentence in the next version.*

*Original: “This skill-value comparison between synthetic and true forecast systems indicates that factors beyond forecast skill influence the value of true forecast systems which we analyze in the following sections to some extent.”*

*Proposed: “This skill-value comparison between synthetic and true forecast systems indicates that factors beyond forecast skill, as defined in this study, influence the value of true forecast systems, which we analyze in the following sections to some extent.”*

L653: References would be helpful at the end of this sentence.

*Response: Thank you for the suggestion. We will cite a few references in the next version.*

*Original: “This study was motivated by recent literature showing that the relationship between forecast skill and value in hydrology is multifaceted and context dependent”*

*Proposed: “This study was motivated by recent literature showing that the relationship between forecast skill and value in hydrology is multifaceted and context dependent (Maurer and Lettenmaier, 2004; Rheinheimer et al., 2016; Hamlet et al., 2002; Portele et al., 2021, Giuliani et al., 2020).”*

## **Figures**

Figure 1: Equation numbers preceded by minus signs can be confusing. In the caption, “forecast probabilities are calculated from probabilistic forecasts” is redundant. Do you mean “threshold exceedance probabilities are calculated from probabilistic forecasts”?

*Response: Thank you for pointing that out. We will revise the caption text as suggested. We will color the equation numbers to avoid confusion in Figure 1. The PEV workflow starts with Step 1, where we use the forecast ensembles as input. We first calculate the forecast probability based on a defined drought event (values 0.4 and 0.6 in red are the forecast probabilities). Based on this forecast probability and critical probability threshold (prescribed range of  $0 < \tau < 1$  – also explained in detail in general comment #3), we decide to act in Step 2. We can provide more clarification in the revised version if needed.*

Figure 2: The arrows used to indicate the cases when  $C < 0$  and  $C > L$  point to ranges where  $C > 0$  and  $C$

*Response: Thank you for pointing that out. We will revise the figure in the next version.*

Figure 4: This figure is helpful. It may be worth mentioning in sub-figure (a) that the AMJJ volume for the forecast year is excluded, if that is the case.

*Response: Thank you for pointing that out. Figure 4a indicates the workflow of synthetic forecasts. The synthetic forecasts are created by introducing errors in the mean and adjusting the variability of observations, with the forecast year's AMJJ volume included in the process.*

Figure 5: “Historical meteorology” and “Basin attributes” are rather vague. I suggest specifying these to better highlight the differences between the three types of modelling/forecasting chains.

*Response: Thank you for pointing that out. While specifying these terms in more detail would indeed help clarify the differences between the workflows, doing so would also complicate the representation of workflow in Figure 5. Instead, we refer readers to Table A2, which provides detailed descriptions of each of these inputs, including their sources.*

Figure 7: The caption should explain the difference between shaded areas (distributions over the 76 basins) and the vertical lines.

*Response: Thank you for that suggestion. We will revise the caption in the next version.*

*Original: “Figure 7: Historical model performance of true forecast systems. (a) Daily NSE, (b) NRMSE of the total April-July streamflow volumes, (c) daily correlation, and (d) Ratio of the standard deviation against observations for WRFH (default and calibrated) and LSTM (initial and final) models. Comparison shown for the 76 basins during the testing period, WY2001-2010.”*

*Proposed: “Figure 7: Historical model performance of true forecast systems. (a) daily NSE, (b) NRMSE of the total April-July streamflow volumes, (c) daily correlation, and (d) the ratio of the standard deviation against observations for calibrated WRFH and fully trained LSTM models. The shaded areas represent the distributions of model performance metrics over the 76 basins, while the vertical lines indicate the performance of individual basins during the testing period, WY2001-2010.”*

Figure 8e: It is not clear why there is a miss based on the time series plot.

*Response: Thank you for pointing that out. The histograms are calculated based on all the ensemble members for every given year. In Figures 8e and 8f, some ensemble members do cause misses ( $M=0.13$ ) and false alarms ( $M=0.01$ ). We will add a sentence for clarification in the revised version.*

*Original: “Fig. 8e, featuring a negative error in mean, hits all events ( $H=0.87$ ) but suffers from high false alarms ( $F=0.70$ ), resulting in a value of 0.03, while Fig. 8f, with a positive error in mean, has almost no false alarms ( $F=0.01$ ) but a lower hit rate ( $H=0.28$ ) resulting in a value of 0.20.”*

*Proposed: “Fig. 8e, featuring a negative error in mean, hits all events ( $H=0.87$ ) but suffers from high false alarms ( $F=0.70$ ), resulting in a value of 0.03, while Fig. 8f, with a positive error in mean, has almost no false alarms ( $F=0.01$ ) but a lower hit rate ( $H=0.28$ ) resulting in a value of 0.20. It should be noted that some ensemble members cause misses ( $M=0.13$ ) and false alarm rates ( $F=0.01$ ) in Figures 8e and 8f, respectively.”*

Figure 9: “Synthetic errors”: if they are calculated from the true forecasts, these are no longer synthetic errors.

*Response: Thank you for pointing that out. We will fix the type in the revised version.*

*Original: “Figure 9: Synthetic errors in (a) mean and (b) standard deviation of three true forecast systems (NRCS, WRFH, and LSTM). Each point represents a basin, and the errors are reported for*

*drought years (below the P25) between WY 2006 and 2022. 76 basins are divided across six ranges, with the square bracket representing the number of basins within each range. ”*

*Proposed: “Figure 9: (a) Errors in mean and (b) changes in variability (with respect to interannual variability during WY2006-2022) of three true forecast systems (NRCS, WRFH, and LSTM). Each point represents a basin, and the errors/changes are reported for drought years (below the P25) between WY 2006 and 2022. 76 basins are divided across six ranges, with the square bracket representing the number of basins within each range. ”*

## **Typos**

L63: Give the full name for NRCS

*Response: Thank you for pointing that out. We will fix this as well as other instances in the revised manuscript.*

*Proposed: “For example, the Natural Resources Conservation Services (hereafter “NRCS”) forecasts have been widely used for water management and agricultural planning (Fleming et al., 2021). ”*

L122 “performance of true forecasts against observations generated in this study” can be unclear as to what is generated in this study.

*Response: Thank you for pointing that out. We will improve the sentence for better clarity.*

*Proposed: “We start by assessing the historical performance of true forecasts generated in this study by comparing them to observations. ”*

L123: “models”

*Response: Thank you for pointing that out. We will fix this in the revised manuscript.*

*Proposed: “This involves comparing the calibrated WRF-Hydro and fully trained LSTM models to assess their effectiveness in simulating streamflow volumes. ”*

L144: “when the AMJJ streamflow volume falls below”

*Response: Thank you for pointing that out. We will fix this in the revised manuscript.*

*Proposed: “This study uses a categorical definition of hydrologic drought, occurring when the AMJJ streamflow volume falls below the 25th percentile (P25) of the historical record. ”*

L205 “where the value of”

*Response: Thank you for pointing that out. We will fix this in the revised manuscript.*

*Proposed: “Using this set of PEV estimates, we construct a  $PEV_{max}$  curve by taking the maximum value from this set for each  $\alpha$ , where the value of  $\alpha$  is equal to the critical probability threshold ( $\tau$ ). ”*

L232: “REV” instead of PEV.

*Response: Thank you for pointing that out. We will fix this in the revised manuscript.*

*Proposed: “Negative PEV values (grey boxes in Fig. 2) indicate decisions that were worse than using the climatology (Laugesen et al., 2023; Richardson, 2000; Wilks, 2001). ”*

L260 “with one or fewer” : not sure about what this means, maybe this is correct.

*Response: Yes, this wording is correct, and we wish to keep it as written.*

L320 “statistical forecasts (...) operational forecasts”

*Response: Thank you for pointing that out. We will fix this in the revised manuscript.*

*Proposed: “In addition, we also use NRCS operational forecasts over the study watersheds to benchmark true forecasts.”*

L452-454: “during WY2001-2010 » appears twice in this sentence.

*Response: Thank you for pointing that out. We will fix this in the revised manuscript.*

*Proposed: “We first compared the performance of the calibrated WRFH and fully trained LSTM models against observations for 76 basins during the testing period, WY2001-2010, using four key metrics: daily NSE, normalized root mean square error (NRMSE) of total AMJJ volume, daily correlation, and the ratio of the standard deviation (Fig. 7).”*

L456: “for both models”

*Response: Thank you for pointing that out. We will fix this in the revised manuscript.*

*Proposed: “The median correlation was greater than 0.7 for both models, with LSTM showing the highest correlation of 0.85, demonstrating a capability to capture temporal dynamics in daily streamflow prediction. LSTM also showed a reasonable ratio of standard deviation of 0.95, whereas WRFH showed 1.25.”*

L458 “These results suggest that the LSTM models, particularly LSTM”

*Response: Thank you for pointing that out. We will fix this in the revised manuscript.*

*Proposed: “These results suggest that the LSTM model performs much better in simulating streamflow than the WRFH model.”*

Figure A3 is titled Figure A2 and referenced as Figure A3 in the text.

*Response: Thank you for pointing that out. We will fix this in the revised manuscript.*

L473 “only for the drought years only”

*Response: Thank you for pointing that out. We will fix this in the revised manuscript.*

*Proposed: “We estimate skill and value only for the drought years (i.e., years below the 25th percentile based on observed AMJJ volumes between WY2006-2022).”*

L493: “the higher number of false alarms reduces”

*Response: Thank you for pointing that out. We will fix this in the revised manuscript.*

*Proposed: “In Fig. 4.8c, with a -50% error in standard deviation, we observe the highest skill (0.05) and value (0.62), as most events are correctly forecasted ( $H=0.73$ ), though a few ensemble members cause false alarms ( $F=0.06$ ). In Fig. 8d, with a +50% error in standard deviation, all events are still hit ( $H=0.63$ ), but the higher false alarms ( $F=0.20$ ) reduces the forecast value from 0.62 to 0.42.”*

L529 and L571 “the three true forecasts”



*Response: Thank you for pointing that out. We will fix this in the revised manuscript.*

*Proposed: “Figure 10 illustrates the normalized mean quantile loss (NMQloss) of the three true forecast systems over the heatmaps developed for synthetic forecasts based on Fig. 8a.”*

*Proposed: “Both scatter plots show the relationship between NMQloss (forecast skill) and APEVmax (forecast value) for the three true forecast systems (WRFH, LSTM, and NRCS), with each point corresponding to a different basin.”*
